# Supplementary material for: Dysregulation of the MiR-449b target TGFBI alters the TGFβ pathway to induce cisplatin resistance in nasopharyngeal carcinoma
Source: PubMed Central journal article supplement (PMC5966388; doi:10.1038/s41389-018-0050-x), 2018-05-22
Supplement: 41389_2018_50_MOESM3_ESM.pdf [file 41389_2018_50_MOESM3_ESM.pdf]

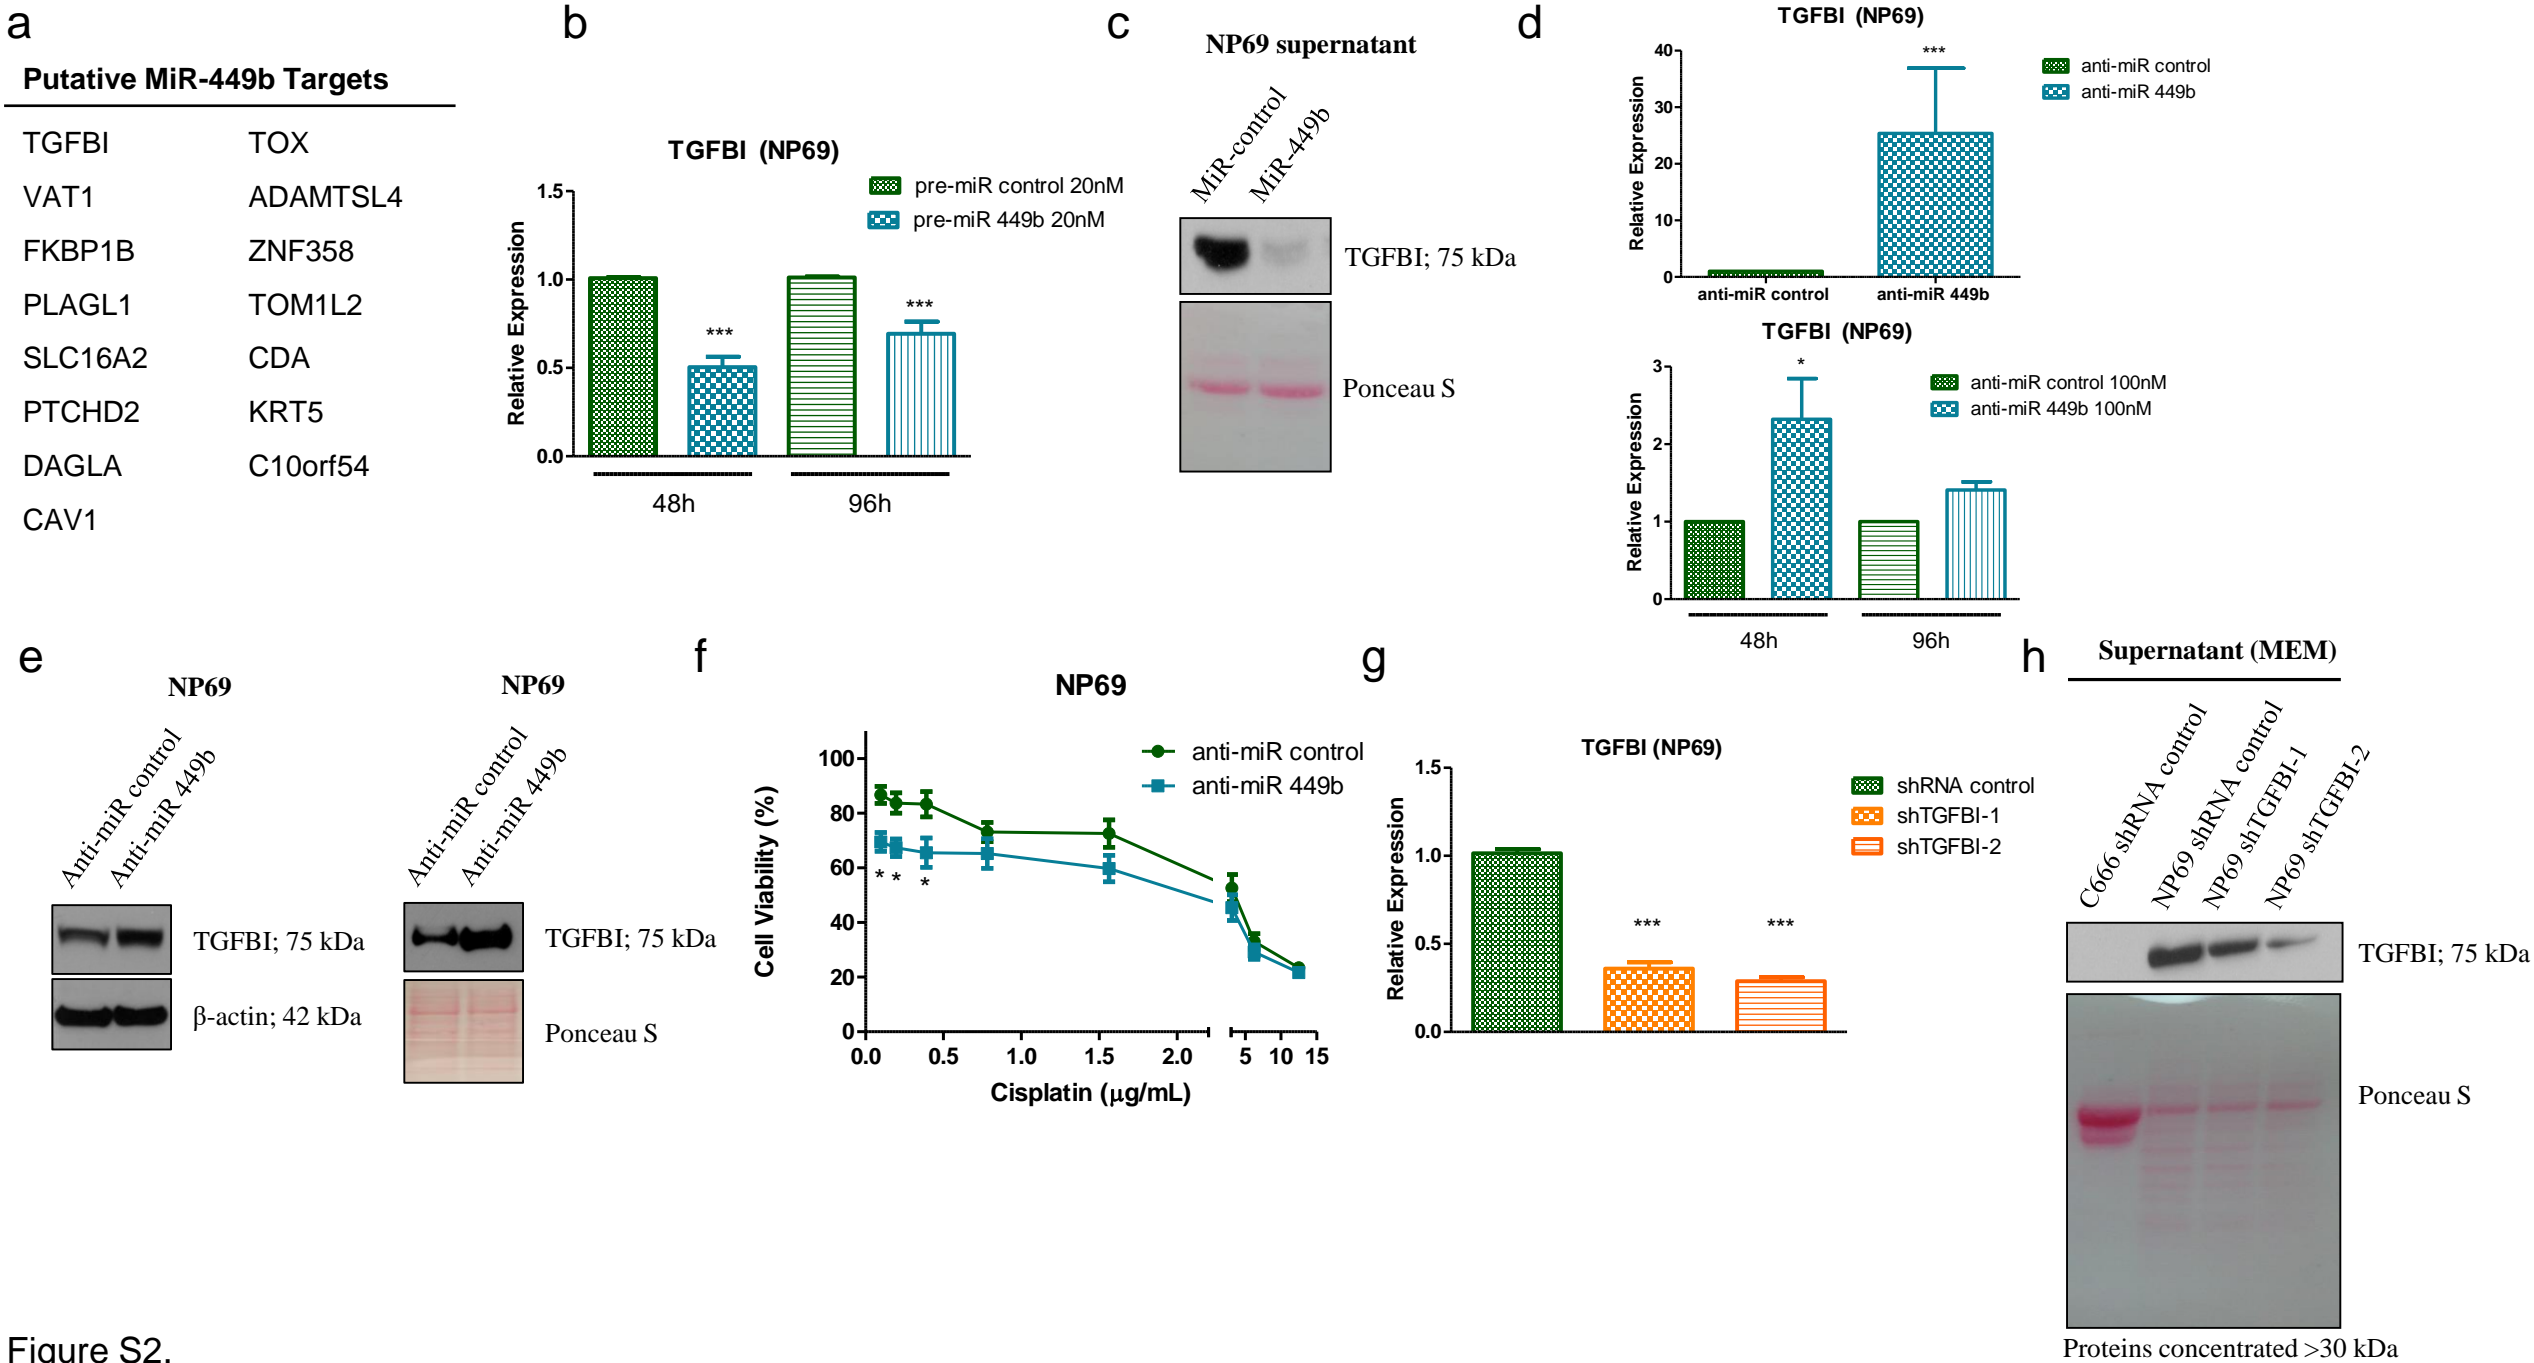

Figure S2.
